# Supplementary material for: Development of an Effective Chain Elongation Process From Acidified Food Waste and Ethanol Into n-Caproate
Source: PubMed Central journal article supplement (PMC5934429; doi:10.3389/fbioe.2018.00050), 2018-04-27
Supplement: Data_Sheet_1.pdf [file Data_Sheet_1.pdf]

# Supplementary material

## Development of an Effective Chain Elongation Process From Acidified Food Waste and Ethanol Into n-Caproate

*Mark Roghair<sup>a</sup>, Yuchen Liu<sup>a</sup>, David P.B.T.B. Strik<sup>a,\*</sup>, Ruud A. Weusthuis<sup>b</sup>, Marieke E. Bruins<sup>c</sup>, Cees J.N. Buisman<sup>a</sup>*

<sup>a</sup> Sub-department of Environmental Technology, Wageningen University & Research, Bornse Weilanden 9, 6708 WG, Wageningen, the Netherlands

<sup>b</sup> Bioprocess Engineering, Wageningen University & Research, Droevendaalsesteeg 1, 6708 PB, Wageningen, the Netherlands

<sup>c</sup> Wageningen Food & Biobased Research, Wageningen University & Research, Bornse Weilanden 9, 6708 WG, Wageningen, the Netherlands

\* Corresponding author: E-mail: david.strik@wur.nl; tel +31 317 483 447

**Table S1.** Mean steady state values at long HRT (day 28 - 58)

| Compound        | Concentration           | Rate                                     | Selectivity | Selectivity |
|-----------------|-------------------------|------------------------------------------|-------------|-------------|
|                 | [mmol·L <sup>-1</sup> ] | [mmol·L <sup>-1</sup> ·d <sup>-1</sup> ] | [mol e %]   | [mol C %]   |
| Ethanol         | 61.4 ± 23.6             | -130.8 ± 6.9                             | N.A.        | N.A.        |
| Propanol        | 1.1 ± 1.0               | 0.3 ± 0.3                                | 0.3         | 0.2         |
| Acetate         | 70.6 ± 12.9             | -15.9 ± 2.9                              | N.A.        | N.A.        |
| Propionate      | 6.0 ± 0.8               | -4.5 ± 0.1                               | N.A.        | N.A.        |
| Isobutyrate     | 5.4 ± 0.5               | -0.4 ± 0.1                               | N.A.        | N.A.        |
| n-Butyrate      | 64.1 ± 7.3              | -9.9 ± 1.6                               | N.A.        | N.A.        |
| Isovalerate     | 3.8 ± 0.3               | -0.1 ± 0.1                               | N.A.        | N.A.        |
| n-Valerate      | 16.2 ± 4.4              | 3.0 ± 1.2                                | 3.9         | 4.0         |
| Isocaproate     | 0.9 ± 0.2               | 0.2 ± 0.1                                | 0.4         | 0.4         |
| n-Caproate      | 201.3 ± 8.7             | 47.1 ± 3.1                               | 76.5        | 76.2        |
| n-Heptanoate    | 4.3 ± 1.7               | 1.1 ± 0.4                                | 2.1         | 2.0         |
| n-Caprylate     | 4.7 ± 1.0               | 1.2 ± 0.3                                | 2.6         | 2.5         |
| CO <sub>2</sub> | 52.7 ± 20.1 % *         | -22.1 ± 1.8                              | N.A.        | N.A.        |
| CH <sub>4</sub> | 37.7 ± 14.7 % *         | 12.8 ± 2.6                               | 5.2         | 3.5         |
| H <sub>2</sub>  | <0.1% *                 |                                          | N.A.        | N.A.        |
| Unidentified    |                         |                                          | 9.1         | 11.2        |

**Table S2.** Mean steady state values at short HRT (day 79 - 103)

| Compound        | Concentration           | Rate                                     | Selectivity | Selectivity |
|-----------------|-------------------------|------------------------------------------|-------------|-------------|
|                 | [mmol·L <sup>-1</sup> ] | [mmol·L <sup>-1</sup> ·d <sup>-1</sup> ] | [mol e %]   | [mol C %]   |
| Ethanol         | 437.3 ± 34.0            | -267.6 ± 23.5                            | N.A.        | N.A.        |
| Propanol        | 0.7 ± 0.9               | 0.7 ± 0.9                                | 0.4         | 0.3         |
| Acetate         | 122.1 ± 8.6             | -13.1 ± 8.3                              | N.A.        | N.A.        |
| Propionate      | 15.5 ± 1.0              | -9.2 ± 1.5                               | N.A.        | N.A.        |
| Isobutyrate     | 6.2 ± 0.4               | -0.9 ± 0.4                               | N.A.        | N.A.        |
| n-Butyrate      | 122.8 ± 11.3            | 18.3 ± 12.4                              | 11.0        | 12.1        |
| Isovalerate     | 4.0 ± 0.3               | -0.5 ± 0.3                               | N.A.        | N.A.        |
| n-Valerate      | 9.4 ± 1.1               | 4.3 ± 0.9                                | 3.2         | 3.4         |
| Isocaproate     | 0.4 ± 0.1               | 0.4 ± 0.1                                | 0.4         | 0.4         |
| n-Caproate      | 60.7 ± 7.8              | 48.1 ± 7.5                               | 44.6        | 46.0        |
| n-Heptanoate    | 0.6 ± 0.1               | 0.6 ± 0.1                                | 0.6         | 0.6         |
| n-Caprylate     | 0.5 ± 0.1               | 0.5 ± 0.1                                | 0.7         | 0.7         |
| CO <sub>2</sub> | 5.4 ± 3.0 % *           | -37.2 ± 0.1                              | N.A.        | N.A.        |
| CH <sub>4</sub> | 77.0 ± 42.0 % *         | 43.8 ± 2.5                               | 10.2        | 7.0         |
| H <sub>2</sub>  | <0.1 % *                |                                          | N.A.        | N.A.        |
| Unidentified    |                         |                                          | 29.0        | 29.5        |

\* Concentrations of gaseous compounds (CO<sub>2</sub>, CH<sub>4</sub>, H<sub>2</sub>) are shown as percentage in the headspace at 1 atm

**Table S3.** Equations to determine how much food waste (FW; expressed in g volatile solids), ethanol (EtOH) and sodium hydroxide (NaOH) would be consumed to yield 1000 g MCFAs in the two-stage system

| Compound                                 | Unit | Equation                                                                                                                                                                                          |
|------------------------------------------|------|---------------------------------------------------------------------------------------------------------------------------------------------------------------------------------------------------|
| Food waste (FW)                          | g VS | $FW = \left( \frac{1000 \text{ g MCFA}}{MW_{MCFA}} \cdot \bar{C}_{MCFA} - Y_{\frac{MCFA}{FW}} \cdot FW \right) \cdot \left  \frac{r_{VFA}}{r_{MCFA}} \right  \cdot \frac{1}{Y_{\frac{VFA}{FW}}}$  |
| Ethanol (EtOH)                           | g    | $EtOH = \left( \frac{1000 \text{ g MCFA}}{MW_{MCFA}} \cdot \bar{C}_{MCFA} - Y_{\frac{MCFA}{FW}} \cdot FW \right) \cdot \left  \frac{r_{EtOH}}{r_{MCFA}} \right  \cdot \frac{MW_{EtOH}}{C_{EtOH}}$ |
| NaOH (Hydrolysis and acidogenesis stage) | g    | $NaOH = FW \cdot \frac{\Delta NaOH}{\Delta FW}$                                                                                                                                                   |
| NaOH (Chain elongation stage)            | g    | $NaOH = EtOH \cdot \frac{r_{NaOH}}{r_{EtOH}}$                                                                                                                                                     |

**Table S4.** Parameters that we used as input for the equations in Table S3 to determine how much food waste (in g VS), ethanol (EtOH) and sodium hydroxide (NaOH) would be consumed to yield 1000 g MCFAs in the two-stage system.

| Parameter description                     | Symbol                          | unit        | Value                 |                       |
|-------------------------------------------|---------------------------------|-------------|-----------------------|-----------------------|
|                                           |                                 |             | HRT = 4 d             | HRT = 1 d             |
| <i>Hydrolysis and acidification stage</i> |                                 |             |                       |                       |
| VFA yield on FW                           | $\frac{Y_{VFA}}{FW}$            | mol C/g VS  | $35.14 \cdot 10^{-3}$ | $35.14 \cdot 10^{-3}$ |
| MCFA yield on FW                          | $\frac{Y_{MCFA}}{FW}$           | mol C/g VS  | $3.39 \cdot 10^{-3}$  | $3.39 \cdot 10^{-3}$  |
| Consumed NaOH per consumed FW             | $\frac{\Delta NaOH}{\Delta FW}$ | g/g VS      | 0.32                  | 0.32                  |
| <i>Chain elongation stage<sup>i</sup></i> |                                 |             |                       |                       |
| Consumed VFAs per produced MCFAs          | $\frac{r_{VFA}}{r_{MCFA}}$      | mol C/mol C | 0.29                  | 0.20                  |
| Consumed ethanol per produced MCFAs       | $\frac{r_{EtOH}}{r_{MCFA}}$     | mol C/mol C | 0.87                  | 1.83                  |
| Average carbon atoms per produced MCFAs   | $\bar{C}_{MCFA}$                | C-atoms/mol | 6.07                  | 6.03                  |
| Average molar weight of produced MCFAs    | $\bar{MW}_{MCFA}$               | g/mol       | 117.13                | 116.61                |
| Consumed NaOH per consumed ethanol        | $\frac{r_{NaOH}}{r_{EtOH}}$     | g/g         | 0.30                  | 0.30                  |
| <i>Constants</i>                          |                                 |             |                       |                       |
| Molar weight of ethanol                   | $MW_{EtOH}$                     | g/mol       | 46.07                 | 46.07                 |
| Carbon atoms per mole ethanol             | $C_{EtOH}$                      | C-atoms/mol | 2                     | 2                     |

<sup>i</sup> Values are based on steady state data

## Future Outlook: Calculations

### MCFA production from wet food waste:

$88 \text{ mln ton wet food waste / yr} \cdot (13.8 \text{ g VS / 100 g wet food waste})^i \cdot (1000 \text{ g MCFAs / 419 g VS})^i = 28.9 \text{ mln ton MCFAs / yr}$

### Required ethanol for MCFA production:

$29 \text{ mln ton MCFAs / yr} \cdot 1000 \cdot (1013 \text{ g ethanol / 1000 g MCFA})^i / (0.789 \text{ kg / L}) / (119.2 \text{ L / barrel}) = 311.1 \text{ mln barrels ethanol / yr}$

### Required NaOH for MCFA production:

$29 \text{ mln ton MCFAs / yr} \cdot ((136 \text{ g NaOH} + 307 \text{ g NaOH}) / 1000 \text{ g MCFA})^i = 12.8 \text{ mln ton NaOH / yr}$

### Required electricity to produce NaOH for MCFA production:

$12.8 \text{ mln ton NaOH / yr} \cdot (3 \text{ kWh / kg NaOH})^{ii} = 38.4 \cdot 1000 \text{ mln kW h / yr} = 38.4 \text{ TW h / yr}$

### Fuel production from MCFAs:

$29 \text{ mln ton MCFAs / yr} \cdot 1000 \cdot (0.61 \text{ g hydrocarbon / g MCFA})^{iii} / (0.73 \text{ kg / L})^{iii} / (119.2 \text{ L / barrel}) = 202 \text{ mln barrels fuel / yr}$

<sup>i</sup> Values based on this study (Figure 2)

<sup>ii</sup> Electricity consumption through the Chloralkali process

<sup>iii</sup> Assumption / theoretical efficiency
